## Accelerometer-Derived and Genetically Inferred Physical Activity and Human Disease

Shaan Khurshid, MD, MPH<sup>1,2,3</sup>; Lu-Chen Weng, PhD<sup>1,2</sup>; Victor Nauffal, MD<sup>2,4</sup>; James P. Pirruccello, MD<sup>1,2,5</sup>; Rachael A. Venn, MD<sup>1,2,5</sup>; Mostafa A. Al-Alusi, MD<sup>1,2,5</sup>; Emelia J. Benjamin, MD, ScM<sup>6,7</sup>; Patrick T. Ellinor, MD, PhD<sup>1,2,3</sup>; Steven A. Lubitz, MD, MPH<sup>1,2,3</sup>

1 – Cardiovascular Research Center, Massachusetts General Hospital, Boston, Massachusetts, USA

2 – Cardiovascular Disease Initiative, Broad Institute of Harvard and the Massachusetts Institute of Technology, Cambridge, Massachusetts, USA

3 – Cardiac Arrhythmia Service, Division of Cardiology, Massachusetts General Hospital, Boston, Massachusetts, USA

4 – Division of Cardiology, Brigham and Women's Hospital, Boston, Massachusetts, USA

5 – Division of Cardiology, Massachusetts General Hospital, Boston, Massachusetts, USA

6 – Boston University School of Public Health, Boston, Massachusetts, USA

7 – Framingham Heart Study, Framingham, Massachusetts, USA

**Short Title:** Physical activity and disease

**Word count:** 2,442 (excluding abstract, online Methods, references, and figure legends)

**Corresponding author:**

Steven A. Lubitz, MD, MPH; Cardiac Arrhythmia Service and Cardiovascular Research Center, Massachusetts General Hospital, 55 Fruit Street, GRB 109, Boston, MA 02114; P:617-643-7339; F:617-726-3852; [slubitz@mgh.harvard.edu](mailto:slubitz@mgh.harvard.edu)

**Key words:** cardiovascular disease, physical activity

1 **Abstract**

2 Physical activity is favorable to health but the relations with human disease and causal  
3 effects are poorly quantified. Previous studies have largely relied on self-reported  
4 estimates<sup>1-3</sup> which are subject to recall bias, confounding, and reverse causality. Using  
5 wrist-worn accelerometer measurements from the UK Biobank, we tested associations  
6 between moderate-to-vigorous physical activity (MVPA) – both total MVPA minutes and  
7 whether MVPA was above a guideline-based threshold of  $\geq 150$  minutes/week<sup>4-6</sup> – and  
8 incidence of over 1,200 diseases. In 96,466 adults who wore accelerometers for one  
9 week (mean age  $62 \pm 8$  years), MVPA was associated with 401 (33%) tested diseases at  
10 a false discovery rate of 1% during a median of 6.2 years follow-up. Greater MVPA was  
11 overwhelmingly associated with reduced disease risk (98% of associations) with hazard  
12 ratios (HRs) ranging from 0.10-0.95 per standard deviation (SD) and associations  
13 spanning all 18 disease categories tested. A similar pattern of associations was  
14 observed when assessing the guideline-based threshold of  $\geq 150$  MVPA minutes/week.  
15 We examined a polygenic risk score for MVPA as an instrumental variable for activity  
16 within a separate UK Biobank sample (N=392,058, mean age  $57 \pm 8$  years). Greater  
17 genetically inferred MVPA was associated with reduced risk of 182 (14%) incident  
18 diseases (HR range 0.74-0.97 per 1 SD), and included strong associations conferring  
19 reduced risks of obstructive bronchitis, peripheral vascular disease, type 2 diabetes,  
20 and gastritis/duodenitis. Objective physical activity is broadly associated with lower  
21 disease incidence and many associations are consistent with a causal effect.

Physical activity may have important health benefits,<sup>5</sup> though the extent and causal effects of physical activity on human disease are poorly quantified. Examining relations between activity and disease risk may provide a comprehensive understanding of the benefits of physical activity, a modifiable lifestyle behavior. Past studies have generally been small and limited in power, and assessed physical activity using self-report data,<sup>1-3</sup> which is subject to recall bias and correlates only modestly with measured energy expenditure.<sup>7</sup> Studies that have measured activity objectively have frequently employed proprietary step counts<sup>8</sup> or continuous acceleration,<sup>9</sup> which may be difficult to contextualize in terms of consensus activity recommendations, which typically recommend specific quantities of moderate-to-vigorous physical activity (MVPA).<sup>4-6</sup> Regardless of the measurement method, traditional study designs may remain subject to confounding (e.g., frailty)<sup>10</sup> and reverse causality.

To address these challenges, we examined a unique, large prospective cohort study, the UK Biobank, which comprises over 90,000 individuals who wore wrist-worn triaxial accelerometers for one week and who also underwent genome-wide genotyping. The use of wearable accelerometer-based physical activity measurements allowed for precise, objective, and reproducible<sup>9</sup> ascertainment of physical activity, quantified in terms of MVPA and also classified into binary categories divided at a guideline-recommended threshold of  $\geq 150$  minutes/week.<sup>4-6</sup> Since physical activity has a heritable component,<sup>9</sup> we then conducted Mendelian randomization (MR) analyses using a genetic risk score as an instrumental variable to further assess potential causal relations between objective physical activity and disease risk in nearly 400,000 separate UK Biobank participants who did not contribute accelerometry data.<sup>11</sup>

## Results

**Measured activity sample.** After removing individuals whose accelerometer measurements failed quality control metrics, we performed phenotypic association testing in 96,466 individuals (**Figure 1**). The mean age was  $62 \pm 8$  years and 56% were female. Individuals had a median MVPA of 135 minutes/week (quartile-1: 65, quartile-3: 250) and 46% of individuals achieved guideline-recommended levels. MVPA distributions are shown in **Supplemental Figure 1**. Detailed sample characteristics are shown in **Table 1** and an overview of the samples is depicted in **Supplemental Figure 2**.

**Associations between measured activity and incident disease.** At a median follow-up of 6.2 years (5.7, 6.7), MVPA was associated with risk of 401 incident diseases at a false discovery rate (FDR) of 1% (**Figure 2a**). Of the significant associations, 394 (98%) indicated a decreased risk of disease with greater MVPA (hazard ratio [HR] range 0.10-0.95 per 1-standard deviation [SD]). Some of the strongest associations included substantially decreased risks of incident heart failure (HR 0.63, 95% CI 0.56-0.71), stage 3 chronic kidney disease (HR 0.66, 95% CI 0.60-0.73), sleep apnea (HR 0.66, 95% CI 0.59-0.75), and hyperlipidemia (HR 0.87, 95% CI 0.84-0.90) (**Supplementary Figure 3**). Overall, associations with reduced disease risk were enriched for cardiac (17%), digestive (14%), endocrine/metabolic (11%), and respiratory conditions (8%) (chi-square  $p < 0.01$ ). The distribution of effect sizes varied by disease category, with the lowest median hazard ratios observed for respiratory, endocrine/metabolic, and neurological diseases (**Figure 2b**). There were seven associations between greater

MVPA and increased risk of disease (HR range 1.10-1.31), and all represented injuries/poisonings, musculoskeletal, and dermatologic conditions, including greater risk of disorders of muscle, ligament, and fascia (HR 1.10, 95% CI 1.03-1.17) and fracture of the radius or ulna (HR 1.11, 95% CI 1.04-1.18). We obtained similar results when categorizing MVPA at the  $\geq 150$  minutes per week threshold recommended in consensus guidelines<sup>4-6</sup> (358 associations with decreased risk of disease, HR range 0.21-0.91, **Supplemental Figure 4**).

**Secondary activity exposures.** We also assessed disease associations using overall mean acceleration, which demonstrated a similar pattern of associations as accelerometer-derived MVPA (**Supplemental Figure 5**). Within 457,633 UK Biobank participants providing self-reported activity data (**Table 1** and **Supplemental Figure 2**), associations between self-reported MVPA (both continuous and categorized at the guideline-based threshold) were qualitatively similar, but effect sizes were consistently smaller (**Figure 2c** and **Supplemental Figures 6-7**). As compared to accelerometer-derived MVPA, self-reported activity had more associations indicating an increased risk of disease, primarily musculoskeletal conditions (e.g., osteoarthritis, HR 1.07, 95% CI 1.06-1.08) and injuries/poisonings (e.g., joint/ligament sprain, HR 1.10, 95% CI 1.07-1.14) (**Supplemental Figures 8-9**). Full results of association testing using each of the outlined exposures are available in the **Supplemental Data**.

### **Genome-wide association study of MVPA and development of genetic instrument.**

We then performed a genome-wide association study of square root-transformed MVPA

in the UK Biobank accelerometer sample. We observed two loci meeting genome-wide significance, with the dominant locus previously reported for accelerometer-derived mean acceleration<sup>12,13</sup> (**Supplemental Figures 10-11** and **Supplemental Table 1**).

Total observed scale heritability ( $h^2$ ) was 0.11 (standard error 0.01). We then pruned the genetic association results to aggregate the association signals into a polygenic risk score (PRS), which served as a genetic instrument for physical activity. The PRS comprised 561 genetic variants and explained 6.6% of the variation in square root MVPA in a linear regression of square root MVPA on PRS, consistent with a sufficiently strong instrument (F-score: 6,716;  $p < 0.01$ , **Supplemental Table 2**).

**Genetically inferred activity sample.** We then used the PRS as a genetic instrument to infer MVPA levels in a separate sample of 392,058 UK Biobank participants who did not contribute to the accelerometer sub-study. The mean age was  $57 \pm 8$  years and 54% were female. Individuals had a median genetically inferred MVPA of 165 minutes/week (quartile-1: 128, quartile-2: 208) and 60% of individuals had genetically inferred MVPA achieving guideline-recommended levels. Inferred MVPA distributions are shown in **Supplemental Figure 1**. Detailed characteristics of the inferred activity sample are shown in **Table 1** and an overview of the sample is depicted in **Supplemental Figure 2**.

**Associations between genetically inferred activity and incident disease.** At a median follow-up of 11.9 years (11.1, 12.6), genetically inferred MVPA was associated with 182 incident diseases (**Figure 3a**). All 182 associations demonstrated lower disease risk with greater inferred MVPA. The distribution of disease categories in which

significant associations were observed was similar to that of measured MVPA, again with enrichment for digestive, circulatory, endocrine/metabolic, and respiratory conditions (**Figure 3a**). Some of the strongest associations included substantially decreased risks of pulmonary hypertension (HR 0.80, 95% CI 0.70-0.93), stage 3 chronic kidney disease (HR 0.94, 95% CI 0.91-0.97), sleep apnea (HR 0.93, 95% CI 0.90-0.97), and type 2 diabetes with neurological manifestations (HR 0.81, 95% CI 0.73-0.81) (**Supplementary Figure 3**).

Guideline-adherent activity according to genetically inferred MVPA was associated with reduced risk of 79 diseases (98% of all significant associations, **Figure 3d** and **Supplemental Figure 12**). Disease-specific effect sizes between genetically inferred and accelerometer-derived MVPA were substantially correlated, with increasing strength of correlation among diseases more strongly associated with measured MVPA (maximum correlation  $r=0.90$ , 95% CI 0.66-0.97, **Figure 3c**).

In total, 70 diseases were significantly associated with both measured (in the accelerometer sample) and inferred (in the non-accelerometer sample) guideline-adherent activity (**Table 2**). Disease-specific effect sizes were highly correlated ( $r=0.83$ , 95% CI 0.75-0.89). Significant genetic associations with some of the largest effect sizes included obstructive chronic bronchitis (HR 0.79, 95% CI 0.74-0.84,  $p=1.6 \times 10^{-15}$ ), peripheral vascular disease (HR 0.90, 95% CI 0.85-0.96,  $p=6.0 \times 10^{-12}$ ), type 2 diabetes (HR 0.92, 95% CI 0.89-0.95,  $p=1.0 \times 10^{-10}$ ), and gastritis/duodenitis (HR 0.93, 95% CI 0.90-0.95,  $p=3.8 \times 10^{-5}$ ). Plots of the 5-year cumulative risk of these four conditions demonstrated consistent and substantial separation of longitudinal disease incidence on the basis of both measured and genetically inferred guideline-adherent activity (**Figure**

4). Risk curves adjusted for age and stratified by sex showed a similar pattern (**Supplemental Figures 13-14**). Full results of association testing using the genetically inferred MVPA exposures are available in the **Supplemental Data**.

**Secondary analyses.** Associations between greater measured and genetically inferred MVPA and decreased risk of disease were consistently observed across subgroups of age (i.e., age <55, age 55-64, and age  $\geq 65$ ), although both the number of significant associations and strength of effect sizes were greatest in older individuals (**Supplemental Figures 15-16**). When assessing alternative MVPA thresholds, a similar pattern of associations was observed at both  $\geq 75$  and  $\geq 300$  MVPA minutes/week, but the total number of significant associations at  $\geq 300$  MVPA minutes/week was smaller (**Supplemental Figures 17-18**). Associations between greater genetically inferred MVPA and lower risk of chronic obstructive bronchitis, peripheral vascular disease, type 2 diabetes, and gastritis/duodenitis were each similar when assessed using a genetic instrument derived after excluding individuals with any of the four conditions prevalent at the time of blood sample collection, suggesting that such associations were not driven by reverse causality (**Supplemental Table 3**).

## Discussion

In summary, within over 90,000 individuals wearing a wrist-based activity sensor over the course of one week, we quantified associations between objective physical activity (quantified as MVPA) and future risk of over 1,000 diseases. We observed strong associations between physical activity and hundreds of conditions, in which



activity was linked to reduced risks of cardiac, digestive, endocrine/metabolic, and respiratory conditions among other disease. Using a genetic instrument for objective physical activity within nearly 400,000 separate individuals, we observed associations between physical activity and over 180 disease entities which are overwhelmingly consistent with a causal protective mechanism.

Our findings support previous observations that objective activity levels are a powerful indicator of disease risk, and are potentially more informative than self-reported activity. Multiple studies have suggested that self-reported activity may be biased,<sup>14</sup> and therefore a weak surrogate for measured activity.<sup>7</sup> Indeed, recent evidence suggests that objective activity measures may be a more powerful predictor of cardiovascular outcomes<sup>15</sup> and mortality<sup>14</sup> than self-reported activity within the same population. We similarly observed substantially stronger effect sizes when assessing guideline-adherent activity using accelerometer-derived as opposed to self-reported MVPA. Interestingly, although the distribution of significant associations was qualitatively similar using objective versus self-reported data, self-reported data suggested a considerably greater number of associations indicating increased disease risk, primarily comprising musculoskeletal conditions and injuries/poisonings. Future work is warranted to better understand potential differences in information content between objectively measured and self-reported physical activity, and how such differences may impact efforts to modify disease risk.

Our results suggest that interventions to increase adherence to guideline-recommended activity levels assessed by objective measurement will have a wide-ranging favorable effect on future disease risk. Whether assessed as a continuous

variable or dichotomized at a guideline-recommended threshold, greater MVPA was associated with reduced risk of roughly 400 diseases. Although associations were enriched for cardiac, digestive, endocrine/metabolic, and respiratory conditions, the breadth of associations we observed spanned every disease category tested, including several protective associations involving neurologic, respiratory, and psychiatric conditions. For example, we observed that individuals meeting guideline-recommended levels of accelerometer-derived MVPA had nearly 40% lower risk of an incident sleep disorder, which is consistent with randomized trial evidence supporting a beneficial role of exercise on sleep.<sup>16,17</sup> In secondary analyses we also observed that achievement of lower levels of activity (i.e.,  $\geq 75$  minutes of MVPA/week) was also associated with lower disease risk, suggesting that efforts to increase objective activity – even if not to the point of achieving guideline-recommended levels – may be broadly beneficial. Although our findings suggest that greater activity should prevent disease, we observed a small number of associations between physical activity and increased risk of certain conditions. In particular, physical activity may increase the likelihood of developing certain musculoskeletal disorders, injuries, and dermatologic diseases (e.g., corns and calluses), potentially reflecting use-related degeneration.<sup>18</sup> On balance, however, our findings suggest that future efforts to optimize objective activity have potential for substantial and wide-ranging beneficial effects spanning the full spectrum of human disease.

The results of the MR analyses, a form of instrumental variable analysis, indicates that increased activity may be causally associated with reduced disease risk. For certain conditions (e.g., obstructive chronic bronchitis, type 2 diabetes), individuals

meeting guideline-recommended activity levels (categorized using either accelerometer-derived or genetically-inferred MVPA) had a substantially lower risk of disease over several years. Some of the associations we observed confirm causal patterns that are relatively well-understood, such as greater activity leading to decreased diabetes risk through mechanisms such as reduced adiposity<sup>19</sup> and increased insulin sensitivity.<sup>20</sup> Similarly, previous work supports a causal effect of exercise on decreased burden of atherosclerosis, potentially mediated by decreased vascular inflammation<sup>21</sup> and improved endothelial function.<sup>22</sup>

Yet we also observed associations between genetically inferred MVPA and conditions for which causal pathways are not well-established, including certain pulmonary (e.g., obstructive chronic bronchitis, chronic airway obstruction, emphysema, and pneumonia) and digestive (e.g., gastritis/duodenitis, diverticulosis) conditions. Although physical activity has been identified as a potential risk factor for recurrent exacerbations of pulmonary disease,<sup>23</sup> and exercise may modulate risk of gastritis through beneficial effects on stress, acid secretion, and chronic inflammation,<sup>24,25</sup> future work is needed to better clarify potential mechanisms. Nevertheless, our findings provide important causal evidence that physical activity may lower disease risk.

Our study should be considered in the context of design. First, objective physical activity was measured for only one week. It is possible that a longer duration of monitoring would have led to more accurate classification of activity. Second, follow-up time after accelerometry (approximately six years) remains fairly limited. Third, given our intent to broadly survey the entire disease phenome for potential causal associations between physical activity and disease, we utilized a PRS as a genetic

instrument in a one-sample Mendelian randomization design, which may be prone to bias introduced by horizontal pleiotropy that we could not account for. Reassuringly, several of the associations we identified are consistent with previously established causal mechanisms.<sup>16,17,19–22,26</sup> Furthermore, associations with exemplar diseases remained robust in sensitivity analyses utilizing a genetic instrument developed after excluding individuals with those diseases present at the time of blood sample collection, providing evidence against reverse causation affecting the genetic instrument. Fourth, the PRS we utilized was derived from and implemented in a source population primarily of European ancestry. As a result, the strength of the genetic instrument may vary if deployed in different populations. Fifth, although our genetic instrument was comparably strong,<sup>27</sup> lack of associations with specific diseases may be related to insufficient power. Indeed, we observed that disease-specific effect sizes were correlated, even for diseases not significantly associated with inferred MVPA at our relatively stringent FDR threshold of 1%. Sixth, our results were obtained within a single community-based sample of primarily European ancestry and may not generalize to other populations.

In summary, we performed phenome-wide association testing for incident disease using a unique resource of objectively measured physical activity obtained within over 90,000 individuals. We observed that objective activity – defined as continuous MVPA as well as according to guideline-based thresholds – is associated with reduced risk of roughly 400 incident conditions spanning the full spectrum of human disease. Using a genetic instrument for objective activity, we found evidence of causal associations between greater activity and reduced risk of over 180 diseases enriched for cardiac, digestive, endocrine/metabolic, and respiratory conditions. Our

findings prioritize optimization of objective physical activity levels as an important population-level mechanism to broadly reduce risk of future disease.

## Methods

**Data availability.** UK Biobank data are freely available for research purposes by application (<https://www.ukbiobank.ac.uk/>). Data processing scripts used to perform the analyses described herein can be found at ([https://github.com/shaankhurshid/acceleration\\_phewas](https://github.com/shaankhurshid/acceleration_phewas)). Detailed summary data supporting major study results are provided in the **Supplementary Data**.

**Study population.** The UK Biobank is a prospective cohort of 502,629 participants enrolled between 2006-2010.<sup>28</sup> Briefly, 9.2 million individuals aged 40-69 years living within 25 miles of 22 assessment centers in the UK were invited, and 5.4% participated in the baseline assessment. Questionnaires and physical measures were collected at recruitment, and all participants are followed for outcomes through linkage to national health-related datasets. All participants provided written informed consent. The UK Biobank was approved by the UK Biobank Research Ethics Committee (reference# 11/NW/0382). Use of UK Biobank data (application 17488) was approved by the local Mass General Brigham Health Institutional Review Board.

**Accelerometer-derived physical activity.** Between February 2013-December 2015, 236,519 UK Biobank participants were invited to wear a wrist-worn accelerometer for one week, of whom 106,053 agreed to participate and 103,695 submitted data.<sup>9</sup>

Participants were sent an Axivity AX3 (Newcastle upon Tyne, UK) wrist-worn triaxial accelerometer. The sensor captured continuous acceleration at 100Hz with dynamic range of  $\pm 8g$ .

As described previously, acceleration signals were calibrated to local gravity.<sup>9,29</sup> Sample data were combined into 5-second epochs, with each epoch represented by the average vector magnitude. Non-wear time was identified as consecutive stationary episodes  $\geq 60$  minutes in duration in which all three axes had standard deviation  $< 13.0mg$ .<sup>30,31</sup> Epochs representing non-wear time were imputed based on the average of similar time-of-day vector magnitude and intensity distribution data points on different days. We excluded individuals with insufficient wear-time to support imputation ( $< 72$  hours of wear-time or no wear data in each one-hour period of the 24-hour cycle), and whose signals were insufficient for calibration.<sup>9</sup>

The primary accelerometer-derived exposure was minutes of moderate-to-vigorous physical activity (MVPA), defined as the sum of 5-second epochs where mean acceleration was  $\geq 100mg$ .<sup>32,33</sup> To reduce the likelihood of misclassifying artifact as MVPA, we extracted MVPA in bouts (5-minute periods where  $\geq 80\%$  of epochs met the MVPA threshold).<sup>33,34</sup> We then classified whether MVPA levels met recommended levels cited in guidelines from the World Health Organization,<sup>4</sup> American College of Cardiology/American Heart Association,<sup>5</sup> and European Society of Cardiology.<sup>6</sup> Secondary exposures included overall mean acceleration, a surrogate for global physical activity that has been validated against energy expenditure.<sup>31,35</sup> We extrapolated the observed MVPA rate to one week for the 5,043 individuals (5%)

contributing less than a full week of wear time to account for variable wear time and to facilitate categorization of weekly guideline-based activity.

**Self-reported physical activity.** Self-reported physical activity data were obtained at enrollment using the short-form international physical activity questionnaire (IPAQ).<sup>36</sup> We quantified self-reported activity as weekly minutes of MVPA to mirror our accelerometer-based analyses, which quantified total time spent performing activities of moderate or greater intensity.

**Polygenic risk score for physical activity.** We then analyzed individuals in the accelerometer sample with genome-wide genotyping data to develop a polygenic risk score (PRS) for objective physical activity, which served as an instrumental variable for physical activity. Details of genotyping and quality control in the UK Biobank have been described in detail previously.<sup>37</sup> We performed a genome-wide association study (GWAS) of MVPA by fitting a linear mixed model with square root-transformed MVPA as the outcome of interest and age, sex, array platform, and the first five principal components of genetic ancestry as covariates. We utilized a square root-transform to attenuate high outliers while preserving sufficient information content to infer MVPA using the genetic instrument. Models were fit using BOLT-LMM.<sup>38</sup> Inflation was assessed using quantile-quantile plots and calculating the linkage-disequilibrium score regression intercept.<sup>39</sup> Lead single nucleotide variants (SNVs) were the most significantly associated variants with the outcome within a 500kb window. The genomic control factor was 1.15 with a linkage-disequilibrium score regression intercept of 1.008,

consistent with polygenicity rather than inflation (**Supplemental Figure 7**). We used a pruning and thresholding approach to construct a PRS to estimate genetically determined MVPA, testing four sets of score parameters (p-value thresholds  $1 \times 10^{-4}$  and  $1 \times 10^{-6}$  permuted against  $R^2$  values of 0.3 and 0.5), each using a 250kb sliding window. The PRS most predictive of square root-transformed MVPA was constructed using a p-value threshold of  $1 \times 10^{-4}$  and an  $R^2$  of 0.3, and explained 6.6% of the variance in square root-transformed MVPA (F-score 6,716), which then served as the instrumental variable for accelerometer-derived MVPA (**Supplemental Table 2**).

We performed a one-sample Mendelian randomization analysis using the two-stage method to examine the causal association between physical activity and incident diseases. In the first stage we fit a linear model within the acceleration GWAS sample with square root-transformed MVPA as the outcome and age, sex, the first five principal components of genetic ancestry, and the best performing PRS as covariates. We then used the fitted model to predict square root-transformed MVPA in 392,061 UK Biobank participants who did not participate in the accelerometer sub-study, and subsequently squared the inferred value to estimate the untransformed MVPA. In the second stage, we examined the association between incident disease and inferred MVPA using Cox-proportional hazards models adjusting for age, sex and the first five principal components of ancestry. As with accelerometer-derived MVPA, we examined inferred MVPA as both a continuous variable and according to the guideline-based threshold of  $\geq 150$  minutes/week.<sup>4-6</sup>

**Outcomes.** We defined diseases using v1.2 of the Phecode Map,<sup>40</sup> a set of 1,867



disease definitions arranged into clinically meaningful groups and identified using standardized sets of International Classification of Disease, 9<sup>th</sup> and 10<sup>th</sup> revision codes. Diagnostic code sources included hospital data through linkage to national health-related datasets, as well as outpatient general practitioner visit data through linkage to electronic health records. In our incident disease analyses of accelerometer-derived variables, person-time started at the end of accelerometer measurement and person-time ended at an event, death, or last follow-up, whichever came first. In our incident disease analyses of both self-reported and inferred activity, person-time started at enrollment (i.e., date of genetic data collection) and was otherwise constructed similarly. The date of last follow-up varied according to availability of linked health data and was therefore defined as March 31, 2021 for participants enrolled in England and Scotland, and February 28, 2018 for participants enrolled in Wales.

**Statistical analysis.** Associations between accelerometer-derived MVPA and incident disease were assessed using Cox proportional hazards regression, with adjustment for age, sex, and body mass index (BMI). Secondary models were constructed using a) adherence to standard physical activity guidelines ( $\geq 150$  minutes of MVPA/week<sup>4-6</sup>) on the basis of accelerometer-derived MVPA, b) overall mean acceleration, c) self-reported MVPA, and d) adherence to standard physical activity guidelines ( $\geq 150$  minutes of MVPA/week<sup>4-6</sup>) on the basis of self-reported data, as exposures of interest. For the 1-sample MR analysis, an analogous model was constructed using inferred MVPA as the exposure of interest, in models adjusted for age, sex, and the first five components of genetic ancestry. To prevent model instability, only diseases with  $\geq 20$  events

(accelerometer-derived MVPA models) and  $\geq 100$  events (genetically inferred MVPA models) were tested. To assess effect size consistency between accelerometer-derived and inferred MVPA, we calculated the Pearson correlation between disease-specific beta coefficients corresponding to accelerometer-derived and inferred MVPA in the respective Cox proportional hazards models described above within their respective independent samples, as a function of the FDR threshold used to define a significant association with accelerometer-derived MVPA. To assess the ability of guideline-adherent activity to stratify risk of incident disease, we plotted the 5-year cumulative risk of obstructive chronic bronchitis, hypertension, type 2 diabetes, and gastritis/duodenitis (four exemplar conditions having significant associations with both accelerometer-derived and inferred MVPA), stratified at the guideline-based threshold of  $\geq 150$  minutes/week of MVPA. We also generated adjusted risk curves by plotting the predicted risk outputs from stratified Cox models fitted with the average age of the sample, guideline-adherent activity as a stratification variable, and male versus female sex separately.

We performed several sensitivity analyses to assess the robustness of our findings. First, we fit analogous models assessing for associations between measured and genetically inferred MVPA and incident disease within age subgroups (i.e., <55, 55-64, and  $\geq 65$  years), approximating tertiles of the sample distribution. Second, we assessed associations between measured and inferred MVPA meeting alternative cutoffs of activity (i.e.,  $\geq 75$  minutes and  $\geq 300$  minutes of MVPA/week), with the latter threshold representing activity levels recommended by the World Health Organization for additional health benefit.<sup>4</sup> Third, to assess whether associations between inferred

activity and incident disease may have been affected by reverse causation mediated by horizontal pleiotropy in the genetic instrument (i.e., disease associations arising from variants associated with existing disease which are also associated with lower activity), we re-tested associations with selected exemplar diseases having strong associations in the primary analyses using a genetic instrument developed among individuals without any of the conditions at the time of blood sample collection.

Except where otherwise specified, all analyses were performed using R v4.0<sup>41</sup> (packages: 'survival', 'data.table', 'fdrtool'). Genome-wide association results were evaluated at  $p=5 \times 10^{-8}$ . Otherwise, all p-values thresholds were corrected for multiplicity by targeting a false discovery rate of 1%. P-values rounding to zero at maximum precision are displayed as  $1 \times 10^{-10}$ .

**Disclosures:** Dr. Lubitz receives sponsored research support from Bristol Myers Squibb / Pfizer, Bayer AG, Boehringer Ingelheim, and Fitbit, and has consulted for Bristol Myers Squibb / Pfizer and Bayer AG, and participates in a research collaboration with IBM. Dr. Ellinor receives sponsored research support from Bayer AG and IBM Health and he has consulted for Bayer AG, Novartis, MyoKardia and Quest Diagnostics.

**Funding support:** Dr. Khurshid is supported by NIH T32HL007208. Dr. Nauffal is supported by NIH T32HL007604. Dr. Ellinor is supported by the NIH grants 1R01HL092577 and K24HL105780, and American Heart Association 18SFRN34110082. Dr. Lubitz is supported by NIH 1R01HL139731 and American Heart Association 18SFRN34250007. Dr. Benjamin is supported by R01HL092577,

R01HL141434, R01AG066010; 1R01AG066914, 2U54HL120163, and American Heart Association 18SFRN34110082. Dr. Weng is supported by American Heart Association 18SFRN34110082.

## References

1. Kiely DK, Wolf PA, Cupples LA, Beiser AS, Kannel WB. Physical activity and stroke risk: the Framingham Study. *Am J Epidemiol.* 1994;140:608–620.
2. Kraigher-Krainer E, Lyass A, Massaro JM, Lee DS, Ho JE, Levy D, Kannel WB, Vasan RS. Association of physical activity and heart failure with preserved vs. reduced ejection fraction in the elderly: the Framingham Heart Study. *Eur J Heart Fail.* 2013;15:742–746.
3. Elliott AD, Linz D, Mishima R, Kadhim K, Gallagher C, Middeldorp ME, Verdicchio CV, Hendriks JML, Lau DH, La Gerche A, et al. Association between physical activity and risk of incident arrhythmias in 402 406 individuals: evidence from the UK Biobank cohort. *Eur Heart J.* 2020;
4. Global recommendations on physical activity for health. Genève: WHO; 2010.
5. Arnett DK, Blumenthal RS, Albert MA, Buroker AB, Goldberger ZD, Hahn EJ, Himmelfarb CD, Khera A, Lloyd-Jones D, McEvoy JW, et al. 2019 ACC/AHA Guideline on the Primary Prevention of Cardiovascular Disease: A Report of the American College of Cardiology/American Heart Association Task Force on Clinical Practice Guidelines. *Circulation.* 2019;140:e596–e646.
6. Piepoli MF, Hoes AW, Agewall S, Albus C, Brotons C, Catapano AL, Cooney M-T, Corrà U, Cosyns B, Deaton C, et al. 2016 European Guidelines on cardiovascular disease prevention in clinical practice: The Sixth Joint Task Force of the European Society of Cardiology and Other Societies on Cardiovascular Disease Prevention in Clinical Practice (constituted by representatives of 10 societies and by invited experts)Developed with the special contribution of the European Association for Cardiovascular Prevention & Rehabilitation (EACPR). *Eur Heart J.* 2016;37:2315–2381.
7. Garriguet D, Tremblay S, Colley RC. Comparison of Physical Activity Adult Questionnaire results with accelerometer data. *Health Rep.* 2015;26:11–17.
8. Lin H, Sardana M, Zhang Y, Liu C, Trinquart L, Benjamin EJ, Manders ES, Fusco K, Kornej J, Hammond MM, et al. Association of Habitual Physical Activity With Cardiovascular Disease Risk. *Circ Res.* 2020;127:1253–1260.
9. Doherty A, Jackson D, Hammerla N, Plötz T, Olivier P, Granat MH, White T, van Hees VT, Trenell MI, Owen CG, et al. Large Scale Population Assessment of Physical Activity Using Wrist Worn Accelerometers: The UK Biobank Study. *PLoS One.* 2017;12:e0169649.
10. Bapat A, Zhang Y, Post WS, Guallar E, Soliman EZ, Heckbert SR, Lima J, Bertoni AG, Alonso A, Nazarian S. Relation of Physical Activity and Incident Atrial Fibrillation (from the Multi-Ethnic Study of Atherosclerosis). *Am J Cardiol.* 2015;116:883–888.

11. Haycock PC, Burgess S, Wade KH, Bowden J, Relton C, Davey Smith G. Best (but oft-forgotten) practices: the design, analysis, and interpretation of Mendelian randomization studies. *Am J Clin Nutr*. 2016;103:965–978.
12. Klimentidis YC, Raichlen DA, Bea J, Garcia DO, Wineinger NE, Mandarino LJ, Alexander GE, Chen Z, Going SB. Genome-wide association study of habitual physical activity in over 377,000 UK Biobank participants identifies multiple variants including CADM2 and APOE. *Int J Obes* 2005. 2018;42:1161–1176.
13. Doherty A, Smith-Byrne K, Ferreira T, Holmes MV, Holmes C, Pulit SL, Lindgren CM. GWAS identifies 14 loci for device-measured physical activity and sleep duration. *Nat Commun*. 2018;9:5257.
14. Tikkanen E, Gustafsson S, Ingelsson E. Associations of Fitness, Physical Activity, Strength, and Genetic Risk With Cardiovascular Disease: Longitudinal Analyses in the UK Biobank Study. *Circulation*. 2018;137:2583–2591.
15. Khurshid S, Weng L-C, Al-Alusi MA, Halford JL, Haimovich JS, Benjamin EJ, Trinquart L, Ellinor PT, McManus DD, Lubitz SA. Accelerometer-derived physical activity and risk of atrial fibrillation. *Eur Heart J*. 2021;
16. Kline CE, Crowley EP, Ewing GB, Burch JB, Blair SN, Durstine JL, Davis JM, Youngstedt SD. The effect of exercise training on obstructive sleep apnea and sleep quality: a randomized controlled trial. *Sleep*. 2011;34:1631–1640.
17. Yang P-Y, Ho K-H, Chen H-C, Chien M-Y. Exercise training improves sleep quality in middle-aged and older adults with sleep problems: a systematic review. *J Physiother*. 2012;58:157–163.
18. Kunnasegaran R, Thevendran G. Hallux Rigidus: Nonoperative Treatment and Orthotics. *Foot Ankle Clin*. 2015;20:401–412.
19. Aune D, Norat T, Leitzmann M, Tonstad S, Vatten LJ. Physical activity and the risk of type 2 diabetes: a systematic review and dose-response meta-analysis. *Eur J Epidemiol*. 2015;30:529–542.
20. Mayer-Davis EJ, D’Agostino R, Karter AJ, Haffner SM, Rewers MJ, Saad M, Bergman RN. Intensity and amount of physical activity in relation to insulin sensitivity: the Insulin Resistance Atherosclerosis Study. *JAMA*. 1998;279:669–674.
21. Pinto A, Di Raimondo D, Tuttolomondo A, Buttà C, Milio G, Licata G. Effects of physical exercise on inflammatory markers of atherosclerosis. *Curr Pharm Des*. 2012;18:4326–4349.
22. Xu M, Duan Y, Xiao J. Exercise Improves the Function of Endothelial Cells by MicroRNA. *J Cardiovasc Transl Res*. 2019;12:391–393.

23. Paneroni M, Simonelli C, Vitacca M, Ambrosino N. Aerobic Exercise Training in Very Severe Chronic Obstructive Pulmonary Disease: A Systematic Review and Meta-Analysis. *Am J Phys Med Rehabil*. 2017;96:541–548.
24. Cheng Y, Macera CA, Davis DR, Blair SN. Physical activity and peptic ulcers. Does physical activity reduce the risk of developing peptic ulcers? *West J Med*. 2000;173:101–107.
25. Kim J, Kim KH, Lee BJ. Association of peptic ulcer disease with obesity, nutritional components, and blood parameters in the Korean population. *PloS One*. 2017;12:e0183777.
26. van der Windt DJ, Sud V, Zhang H, Tsung A, Huang H. The Effects of Physical Exercise on Fatty Liver Disease. *Gene Expr*. 2018;18:89–101.
27. Davies NM, Holmes MV, Davey Smith G. Reading Mendelian randomisation studies: a guide, glossary, and checklist for clinicians. *BMJ*. 2018;k601.
28. Littlejohns TJ, Sudlow C, Allen NE, Collins R. UK Biobank: opportunities for cardiovascular research. *Eur Heart J*. 2019;40:1158–1166.
29. van Hees VT, Fang Z, Langford J, Assah F, Mohammad A, da Silva ICM, Trenell MI, White T, Wareham NJ, Brage S. Autocalibration of accelerometer data for free-living physical activity assessment using local gravity and temperature: an evaluation on four continents. *J Appl Physiol Bethesda Md 1985*. 2014;117:738–744.
30. Sabia S, van Hees VT, Shipley MJ, Trenell MI, Hagger-Johnson G, Elbaz A, Kivimaki M, Singh-Manoux A. Association between questionnaire- and accelerometer-assessed physical activity: the role of sociodemographic factors. *Am J Epidemiol*. 2014;179:781–790.
31. van Hees VT, Renström F, Wright A, Gradmark A, Catt M, Chen KY, Löf M, Bluck L, Pomeroy J, Wareham NJ, et al. Estimation of daily energy expenditure in pregnant and non-pregnant women using a wrist-worn tri-axial accelerometer. *PloS One*. 2011;6:e22922.
32. Hildebrand M, VAN Hees VT, Hansen BH, Ekelund U. Age group comparability of raw accelerometer output from wrist- and hip-worn monitors. *Med Sci Sports Exerc*. 2014;46:1816–1824.
33. Menai M, van Hees VT, Elbaz A, Kivimaki M, Singh-Manoux A, Sabia S. Accelerometer assessed moderate-to-vigorous physical activity and successful ageing: results from the Whitehall II study. *Sci Rep*. 2017;7:45772.
34. da Silva IC, van Hees VT, Ramires VV, Knuth AG, Bielemann RM, Ekelund U, Brage S, Hallal PC. Physical activity levels in three Brazilian birth cohorts as

- assessed with raw triaxial wrist accelerometry. *Int J Epidemiol.* 2014;43:1959–1968.
35. White T, Westgate K, Wareham NJ, Brage S. Estimation of Physical Activity Energy Expenditure during Free-Living from Wrist Accelerometry in UK Adults. *PLOS ONE.* 2016;11:e0167472.
  36. Craig CL, Marshall AL, Sjöström M, Bauman AE, Booth ML, Ainsworth BE, Pratt M, Ekelund U, Yngve A, Sallis JF, et al. International physical activity questionnaire: 12-country reliability and validity. *Med Sci Sports Exerc.* 2003;35:1381–1395.
  37. Bycroft C, Freeman C, Petkova D, Band G, Elliott LT, Sharp K, Motyer A, Vukcevic D, Delaneau O, O’Connell J, et al. The UK Biobank resource with deep phenotyping and genomic data. *Nature.* 2018;562:203–209.
  38. Loh P-R, Kichaev G, Gazal S, Schoech AP, Price AL. Mixed-model association for biobank-scale datasets. *Nat Genet.* 2018;50:906–908.
  39. Bulik-Sullivan BK, Loh P-R, Finucane HK, Ripke S, Yang J, Schizophrenia Working Group of the Psychiatric Genomics Consortium, Patterson N, Daly MJ, Price AL, Neale BM. LD Score regression distinguishes confounding from polygenicity in genome-wide association studies. *Nat Genet.* 2015;47:291–295.
  40. Wu P, Gifford A, Meng X, Li X, Campbell H, Varley T, Zhao J, Carroll R, Bastarache L, Denny JC, et al. Mapping ICD-10 and ICD-10-CM Codes to Phecodes: Workflow Development and Initial Evaluation. *JMIR Med Inform.* 2019;7:e14325.
  41. R Core Team (2015). R: A language and environment for statistical computing. R Foundation for Statistical Computing Vienna, Austria. URL <https://www.R-project.org/>.



**Table 1.** Baseline characteristics of study samples

| <b>Baseline Characteristic*</b>                                                                                                                                                                                                                                                                                                                                                                                                                         | <b>Wrist-worn accelerometer sample (N=96,466)</b> | <b>Self-reported activity sample (N=457,633)<sup>†</sup></b> | <b>Genetically inferred activity sample (N=392,058)</b> |
|---------------------------------------------------------------------------------------------------------------------------------------------------------------------------------------------------------------------------------------------------------------------------------------------------------------------------------------------------------------------------------------------------------------------------------------------------------|---------------------------------------------------|--------------------------------------------------------------|---------------------------------------------------------|
| Age                                                                                                                                                                                                                                                                                                                                                                                                                                                     | 62.4 ± 7.8                                        | 56.9 ± 8.1                                                   | 57.1 ± 8.1                                              |
| Female sex                                                                                                                                                                                                                                                                                                                                                                                                                                              | 54,317 (56.3%)                                    | 245,681 (53.7%)                                              | 210,793 (53.8%)                                         |
| Race <sup>‡</sup>                                                                                                                                                                                                                                                                                                                                                                                                                                       |                                                   |                                                              |                                                         |
| White                                                                                                                                                                                                                                                                                                                                                                                                                                                   | 93,177 (96.6%)                                    | 434,397 (94.9%)                                              | 367,216 (93.7%)                                         |
| Asian                                                                                                                                                                                                                                                                                                                                                                                                                                                   | 1,118 (1.2%)                                      | 8,871 (1.9%)                                                 | 9,823 (2.5%)                                            |
| Black                                                                                                                                                                                                                                                                                                                                                                                                                                                   | 807 (0.8%)                                        | 6,559 (1.4%)                                                 | 6,861 (1.7%)                                            |
| Mixed                                                                                                                                                                                                                                                                                                                                                                                                                                                   | 528 (0.5%)                                        | 2,654 (0.6%)                                                 | 2,328 (0.6%)                                            |
| Other/Unknown                                                                                                                                                                                                                                                                                                                                                                                                                                           | 836 (0.9%)                                        | 5,152 (1.1%)                                                 | 5,830 (1.5%)                                            |
| Tobacco                                                                                                                                                                                                                                                                                                                                                                                                                                                 |                                                   |                                                              |                                                         |
| Current                                                                                                                                                                                                                                                                                                                                                                                                                                                 | 6,496 (6.7%)                                      | 46,191 (10.1%)                                               | 44,345 (11.3%)                                          |
| Former                                                                                                                                                                                                                                                                                                                                                                                                                                                  | 34,721 (36.0%)                                    | 159,252 (34.8%)                                              | 134,119 (34.2%)                                         |
| Never                                                                                                                                                                                                                                                                                                                                                                                                                                                   | 55,249 (57.3%)                                    | 252,190 (55.1%)                                              | 213,594 (54.7%)                                         |
| Height (cm)                                                                                                                                                                                                                                                                                                                                                                                                                                             | 169.0 ± 9.1                                       | 168.7 ± 9.3                                                  | 168.3 ± 9.3                                             |
| Weight (kg)                                                                                                                                                                                                                                                                                                                                                                                                                                             | 76.6 ± 15.4                                       | 78.0 ± 15.9                                                  | 78.4 ± 16.0                                             |
| Body mass index (kg/m <sup>2</sup> )                                                                                                                                                                                                                                                                                                                                                                                                                    | 26.7 ± 4.5                                        | 27.3 ± 4.7                                                   | 27.6 ± 4.8                                              |
| Hypertension                                                                                                                                                                                                                                                                                                                                                                                                                                            | 27,154 (28.1%)                                    | 130,776 (28.6%)                                              | 118,170 (30.1%)                                         |
| Diabetes                                                                                                                                                                                                                                                                                                                                                                                                                                                | 3,205 (3.3%)                                      | 11,594 (2.5%)                                                | 11,426 (2.9%)                                           |
| <p>*Baseline characteristics defined at end accelerometer wear for acceleration sample, otherwise defined at enrollment<br/> <sup>†</sup>N=354,083 are included in the genetically inferred activity sample and N=92,289 are included in the wrist-worn accelerometer sample. There is no overlap between the accelerometer sample and the genetic inferred activity sample (see <b>Supplemental Figure 2</b>).<br/> <sup>‡</sup>Self-reported race</p> |                                                   |                                                              |                                                         |

**Table 2.** Diseases associated with at least 150 minutes per week of moderate to vigorous physical activity

| Disease                                                | Measured MVPA         |                        | Genetically inferred MVPA |                        |
|--------------------------------------------------------|-----------------------|------------------------|---------------------------|------------------------|
|                                                        | Hazard ratio (95% CI) | p                      | Hazard ratio (95% CI)     | p                      |
| <b>Circulatory system</b>                              |                       |                        |                           |                        |
| Essential hypertension                                 | 0.79 (0.76-0.82)      | 2.23x10 <sup>-07</sup> | 0.96 (0.94-0.97)          | 1.00x10 <sup>-10</sup> |
| Hypertension                                           | 0.79 (0.76-0.82)      | 2.35x10 <sup>-07</sup> | 0.96 (0.94-0.97)          | 1.00x10 <sup>-10</sup> |
| Other chronic ischemic heart disease, unspecified      | 0.67 (0.60-0.74)      | 2.36x10 <sup>-07</sup> | 0.92 (0.89-0.95)          | 7.82x10 <sup>-14</sup> |
| Peripheral vascular disease, unspecified               | 0.37 (0.28-0.49)      | 1.18x10 <sup>-04</sup> | 0.87 (0.81-0.93)          | 1.09x10 <sup>-12</sup> |
| Nonspecific chest pain                                 | 0.79 (0.73-0.85)      | 1.37x10 <sup>-04</sup> | 0.95 (0.92-0.97)          | 1.11x10 <sup>-08</sup> |
| Angina pectoris                                        | 0.67 (0.60-0.75)      | 1.73x10 <sup>-04</sup> | 0.93 (0.89-0.97)          | 1.25x10 <sup>-11</sup> |
| Congestive heart failure (CHF) NOS                     | 0.59 (0.50-0.70)      | 3.15x10 <sup>-04</sup> | 0.91 (0.87-0.96)          | 3.94x10 <sup>-10</sup> |
| Circulatory disease NEC                                | 0.70 (0.65-0.76)      | 6.29x10 <sup>-04</sup> | 0.95 (0.92-0.98)          | 1.00x10 <sup>-10</sup> |
| Peripheral vascular disease                            | 0.54 (0.46-0.65)      | 6.34x10 <sup>-04</sup> | 0.90 (0.85-0.96)          | 5.95x10 <sup>-12</sup> |
| <b>Digestive system</b>                                |                       |                        |                           |                        |
| Diseases of esophagus                                  | 0.76 (0.72-0.81)      | 5.91x10 <sup>-09</sup> | 0.93 (0.91-0.96)          | 1.00x10 <sup>-10</sup> |
| Esophagitis, GERD and related diseases                 | 0.77 (0.72-0.81)      | 5.99x10 <sup>-09</sup> | 0.93 (0.91-0.95)          | 1.00x10 <sup>-10</sup> |
| Gastritis and duodenitis                               | 0.86 (0.80-0.92)      | 4.05x10 <sup>-08</sup> | 0.93 (0.90-0.95)          | 3.78x10 <sup>-05</sup> |
| Diverticulosis                                         | 0.79 (0.74-0.83)      | 1.97x10 <sup>-06</sup> | 0.94 (0.92-0.97)          | 2.22x10 <sup>-16</sup> |
| GERD                                                   | 0.77 (0.72-0.83)      | 4.27x10 <sup>-06</sup> | 0.94 (0.91-0.96)          | 2.89x10 <sup>-13</sup> |
| Constipation                                           | 0.76 (0.70-0.83)      | 3.47x10 <sup>-05</sup> | 0.94 (0.91-0.97)          | 1.10x10 <sup>-09</sup> |
| Functional digestive disorders                         | 0.80 (0.75-0.86)      | 5.96x10 <sup>-05</sup> | 0.95 (0.92-0.97)          | 6.12x10 <sup>-11</sup> |
| Anal and rectal conditions                             | 0.87 (0.79-0.95)      | 6.21x10 <sup>-05</sup> | 0.93 (0.89-0.96)          | 3.42x10 <sup>-04</sup> |
| Other specified gastritis                              | 0.84 (0.75-0.93)      | 7.07x10 <sup>-05</sup> | 0.91 (0.87-0.96)          | 1.35x10 <sup>-04</sup> |
| Personal history of diseases of digestive system       | 0.79 (0.73-0.85)      | 1.18x10 <sup>-04</sup> | 0.94 (0.91-0.97)          | 5.77x10 <sup>-10</sup> |
| <b>Endocrine/metabolic system</b>                      |                       |                        |                           |                        |
| Obesity                                                | 0.69 (0.63-0.75)      | 5.02x10 <sup>-12</sup> | 0.90 (0.87-0.93)          | 1.00x10 <sup>-10</sup> |
| Overweight, obesity and other hyperalimentation        | 0.69 (0.64-0.76)      | 7.83x10 <sup>-12</sup> | 0.90 (0.87-0.93)          | 1.00x10 <sup>-10</sup> |
| Type 2 diabetes                                        | 0.60 (0.54-0.66)      | 9.77x10 <sup>-08</sup> | 0.92 (0.89-0.95)          | 1.00x10 <sup>-10</sup> |
| Diabetes mellitus                                      | 0.64 (0.58-0.70)      | 3.12x10 <sup>-07</sup> | 0.93 (0.90-0.96)          | 1.00x10 <sup>-10</sup> |
| Hyperlipidemia                                         | 0.80 (0.76-0.86)      | 1.53x10 <sup>-05</sup> | 0.95 (0.93-0.97)          | 1.94x10 <sup>-12</sup> |
| Disorders of lipid metabolism                          | 0.81 (0.76-0.86)      | 1.81x10 <sup>-05</sup> | 0.95 (0.93-0.97)          | 3.03x10 <sup>-12</sup> |
| Disorders of fluid, electrolyte, and acid-base balance | 0.68 (0.62-0.74)      | 2.71x10 <sup>-05</sup> | 0.93 (0.91-0.96)          | 1.11x10 <sup>-16</sup> |
| Hypercholesterolemia                                   | 0.80 (0.76-0.86)      | 4.02x10 <sup>-05</sup> | 0.95 (0.93-0.98)          | 6.48x10 <sup>-12</sup> |
| Polyneuropathy in diabetes                             | 0.18 (0.08-0.39)      | 5.87x10 <sup>-04</sup> | 0.76 (0.65-0.89)          | 1.60x10 <sup>-05</sup> |
| <b>Genitourinary system</b>                            |                       |                        |                           |                        |
| Renal failure                                          | 0.69 (0.63-0.74)      | 1.44x10 <sup>-05</sup> | 0.94 (0.91-0.97)          | 1.00x10 <sup>-10</sup> |
| Chronic renal failure                                  | 0.62 (0.55-0.69)      | 7.19x10 <sup>-04</sup> | 0.94 (0.90-0.97)          | 1.00x10 <sup>-10</sup> |
| <b>Hematopoietic system</b>                            |                       |                        |                           |                        |

| Disease                                                        | Measured MVPA         |                        | Genetically inferred MVPA |                        |
|----------------------------------------------------------------|-----------------------|------------------------|---------------------------|------------------------|
|                                                                | Hazard ratio (95% CI) | p                      | Hazard ratio (95% CI)     | p                      |
| Iron deficiency anemias, unspecified or not due to blood loss  | 0.75 (0.68-0.84)      | 3.70x10 <sup>-04</sup> | 0.93 (0.89-0.97)          | 7.14x10 <sup>-08</sup> |
| Iron deficiency anemias                                        | 0.76 (0.68-0.84)      | 7.82x10 <sup>-04</sup> | 0.94 (0.90-0.97)          | 8.37x10 <sup>-08</sup> |
| <b>Injuries and poisonings</b>                                 |                       |                        |                           |                        |
| Poisoning by antibiotics                                       | 0.76 (0.70-0.82)      | 4.55x10 <sup>-08</sup> | 0.92 (0.89-0.95)          | 1.54x10 <sup>-12</sup> |
| Allergy/adverse effect of penicillin                           | 0.76 (0.7-0.83)       | 5.08x10 <sup>-07</sup> | 0.92 (0.88-0.95)          | 5.44x10 <sup>-10</sup> |
| Poisoning by analgesics, antipyretics, and antirheumatics      | 0.70 (0.62-0.79)      | 5.59x10 <sup>-05</sup> | 0.91 (0.87-0.95)          | 4.06x10 <sup>-09</sup> |
| Personal history of allergy to medicinal agents                | 0.66 (0.59-0.73)      | 2.51x10 <sup>-04</sup> | 0.93 (0.89-0.96)          | 8.88x10 <sup>-16</sup> |
| <b>Mental disorders</b>                                        |                       |                        |                           |                        |
| Tobacco use disorder                                           | 0.55 (0.49-0.62)      | 1.48x10 <sup>-12</sup> | 0.88 (0.85-0.91)          | 1.00x10 <sup>-10</sup> |
| Other mental disorder                                          | 0.82 (0.78-0.86)      | 2.78x10 <sup>-10</sup> | 0.94 (0.92-0.96)          | 2.20x10 <sup>-14</sup> |
| Depression                                                     | 0.68 (0.62-0.75)      | 1.97x10 <sup>-05</sup> | 0.93 (0.90-0.96)          | 1.61x10 <sup>-14</sup> |
| Major depressive disorder                                      | 0.68 (0.62-0.75)      | 2.05x10 <sup>-05</sup> | 0.93 (0.90-0.96)          | 1.62x10 <sup>-14</sup> |
| Mood disorders                                                 | 0.68 (0.62-0.75)      | 3.09x10 <sup>-05</sup> | 0.93 (0.90-0.96)          | 1.34x10 <sup>-14</sup> |
| Anxiety disorder                                               | 0.71 (0.65-0.78)      | 1.79x10 <sup>-04</sup> | 0.93 (0.90-0.97)          | 6.62x10 <sup>-13</sup> |
| Anxiety disorders                                              | 0.70 (0.63-0.76)      | 7.11x10 <sup>-04</sup> | 0.94 (0.90-0.97)          | 4.54x10 <sup>-14</sup> |
| Intervertebral disc disorders                                  | 0.81 (0.70-0.93)      | 2.54x10 <sup>-06</sup> | 0.88 (0.83-0.93)          | 3.66x10 <sup>-04</sup> |
| Spinal stenosis                                                | 0.65 (0.56-0.76)      | 2.61x10 <sup>-05</sup> | 0.88 (0.83-0.94)          | 6.64x10 <sup>-08</sup> |
| Osteoarthritis NOS                                             | 0.82 (0.77-0.87)      | 1.02x10 <sup>-04</sup> | 0.95 (0.93-0.98)          | 1.89x10 <sup>-09</sup> |
| Arthropathy NOS                                                | 0.86 (0.77-0.95)      | 4.78x10 <sup>-04</sup> | 0.93 (0.89-0.97)          | 3.28x10 <sup>-04</sup> |
| <b>Neoplasms</b>                                               |                       |                        |                           |                        |
| Chemotherapy                                                   | 0.73 (0.68-0.78)      | 1.25x10 <sup>-11</sup> | 0.93 (0.91-0.95)          | 1.00x10 <sup>-10</sup> |
| Benign neoplasm of colon                                       | 0.85 (0.80-0.91)      | 3.13x10 <sup>-06</sup> | 0.94 (0.91-0.96)          | 1.40x10 <sup>-06</sup> |
| Cancer within the respiratory system                           | 0.60 (0.49-0.74)      | 4.89x10 <sup>-06</sup> | 0.87 (0.81-0.92)          | 8.89x10 <sup>-07</sup> |
| Cancer of bronchus; lung                                       | 0.59 (0.47-0.74)      | 7.81x10 <sup>-06</sup> | 0.86 (0.80-0.92)          | 4.97x10 <sup>-06</sup> |
| <b>Neurological system</b>                                     |                       |                        |                           |                        |
| Sleep disorders                                                | 0.66 (0.57-0.77)      | 3.51x10 <sup>-04</sup> | 0.91 (0.87-0.96)          | 1.31x10 <sup>-07</sup> |
| <b>Other</b>                                                   |                       |                        |                           |                        |
| Other tests                                                    | 0.84 (0.80-0.89)      | 1.06x10 <sup>-06</sup> | 0.95 (0.93-0.97)          | 7.68x10 <sup>-11</sup> |
| <b>Respiratory system</b>                                      |                       |                        |                           |                        |
| Obstructive chronic bronchitis                                 | 0.35 (0.28-0.46)      | 3.66x10 <sup>-15</sup> | 0.79 (0.74-0.84)          | 1.55x10 <sup>-15</sup> |
| Chronic bronchitis                                             | 0.34 (0.27-0.44)      | 4.11x10 <sup>-15</sup> | 0.79 (0.75-0.84)          | 1.00x10 <sup>-10</sup> |
| Chronic airway obstruction                                     | 0.51 (0.46-0.57)      | 1.00x10 <sup>-10</sup> | 0.84 (0.81-0.87)          | 1.00x10 <sup>-10</sup> |
| Other diseases of respiratory system, NEC                      | 0.62 (0.56-0.70)      | 8.22x10 <sup>-09</sup> | 0.89 (0.86-0.93)          | 2.22x10 <sup>-16</sup> |
| Other diseases of respiratory system, not elsewhere classified | 0.63 (0.57-0.71)      | 3.25x10 <sup>-08</sup> | 0.90 (0.86-0.93)          | 5.55x10 <sup>-16</sup> |
| Respiratory failure, insufficiency, arrest                     | 0.55 (0.47-0.64)      | 3.47x10 <sup>-08</sup> | 0.86 (0.82-0.91)          | 2.01x10 <sup>-13</sup> |
| Respiratory failure                                            | 0.57 (0.47-0.68)      | 6.31x10 <sup>-08</sup> | 0.85 (0.80-0.90)          | 2.72x10 <sup>-09</sup> |

| Disease                                                                                                                                             | Measured MVPA         |                        | Genetically inferred MVPA |                        |
|-----------------------------------------------------------------------------------------------------------------------------------------------------|-----------------------|------------------------|---------------------------|------------------------|
|                                                                                                                                                     | Hazard ratio (95% CI) | p                      | Hazard ratio (95% CI)     | p                      |
| Emphysema                                                                                                                                           | 0.40 (0.31-0.52)      | 2.80x10 <sup>-07</sup> | 0.82 (0.76-0.88)          | 4.29x10 <sup>-12</sup> |
| Pneumonia                                                                                                                                           | 0.65 (0.60-0.71)      | 5.12x10 <sup>-06</sup> | 0.93 (0.90-0.96)          | 1.00x10 <sup>-10</sup> |
| Pneumococcal pneumonia                                                                                                                              | 0.60 (0.54-0.68)      | 1.84x10 <sup>-05</sup> | 0.91 (0.88-0.95)          | 1.00x10 <sup>-10</sup> |
| Bacterial pneumonia                                                                                                                                 | 0.62 (0.55-0.69)      | 1.88x10 <sup>-05</sup> | 0.92 (0.88-0.95)          | 1.11x10 <sup>-16</sup> |
| Postinflammatory pulmonary fibrosis                                                                                                                 | 0.63 (0.48-0.84)      | 6.34x10 <sup>-05</sup> | 0.82 (0.75-0.90)          | 1.39x10 <sup>-04</sup> |
| Other symptoms of respiratory system                                                                                                                | 0.76 (0.69-0.85)      | 9.27x10 <sup>-05</sup> | 0.93 (0.90-0.96)          | 5.33x10 <sup>-07</sup> |
| Shortness of breath                                                                                                                                 | 0.72 (0.64-0.82)      | 3.75x10 <sup>-04</sup> | 0.93 (0.89-0.97)          | 3.80x10 <sup>-07</sup> |
| Respiratory insufficiency                                                                                                                           | 0.42 (0.28-0.64)      | 5.14x10 <sup>-04</sup> | 0.85 (0.78-0.93)          | 4.45x10 <sup>-05</sup> |
| <b>Symptoms</b>                                                                                                                                     |                       |                        |                           |                        |
| Back pain                                                                                                                                           | 0.74 (0.66-0.83)      | 1.57x10 <sup>-07</sup> | 0.91 (0.88-0.94)          | 1.31x10 <sup>-07</sup> |
| Myalgia and myositis unspecified                                                                                                                    | 0.48 (0.38-0.60)      | 5.75x10 <sup>-05</sup> | 0.85 (0.79-0.92)          | 1.03x10 <sup>-10</sup> |
| NEC=Not elsewhere classified; NOS=not otherwise specified<br>P-values rounding to zero at maximum precision are displayed as 1.00x10 <sup>-10</sup> |                       |                        |                           |                        |

**Figure 1. Study overview**

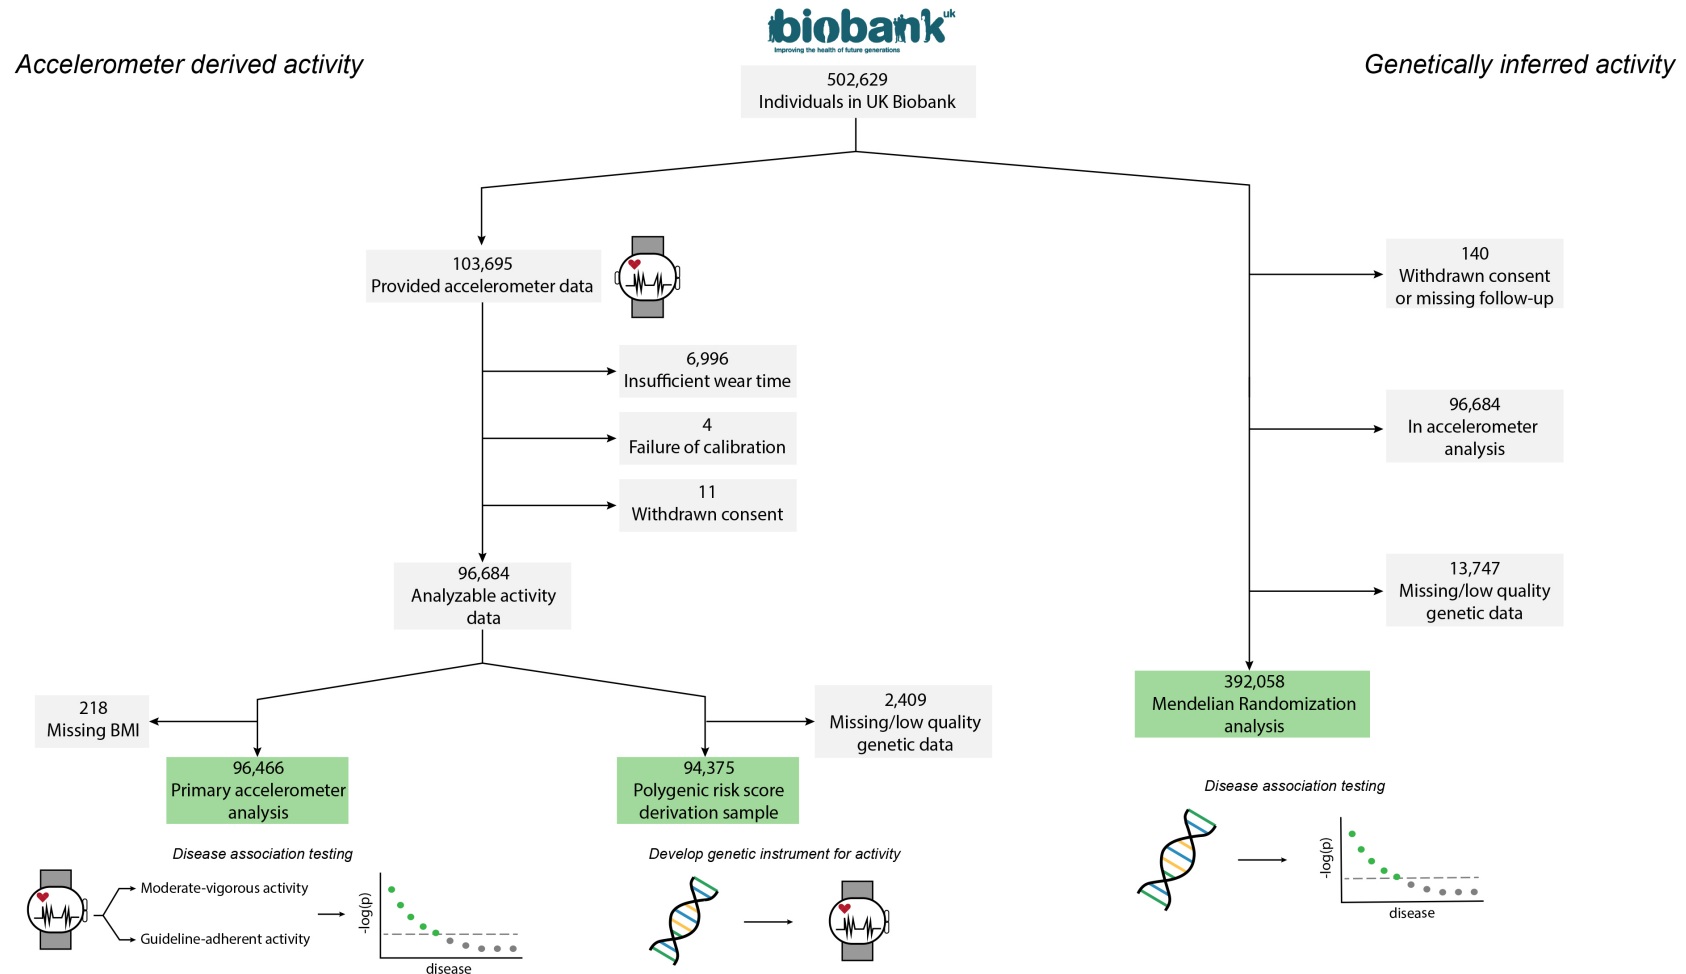

Depicted is a graphical overview of the study design. We performed association testing in 96,466 UK Biobank participants who wore a wrist-worn accelerometer for one week. We then performed a genome-wide association study using this sample to develop a polygenic risk score to act as a genetic instrument for activity. In a separate set of 392,058 UK Biobank participants, we inferred physical activity using the genetic instrument and performed analogous association testing with incident disease.

**Figure 2. Measured physical activity and incident disease**

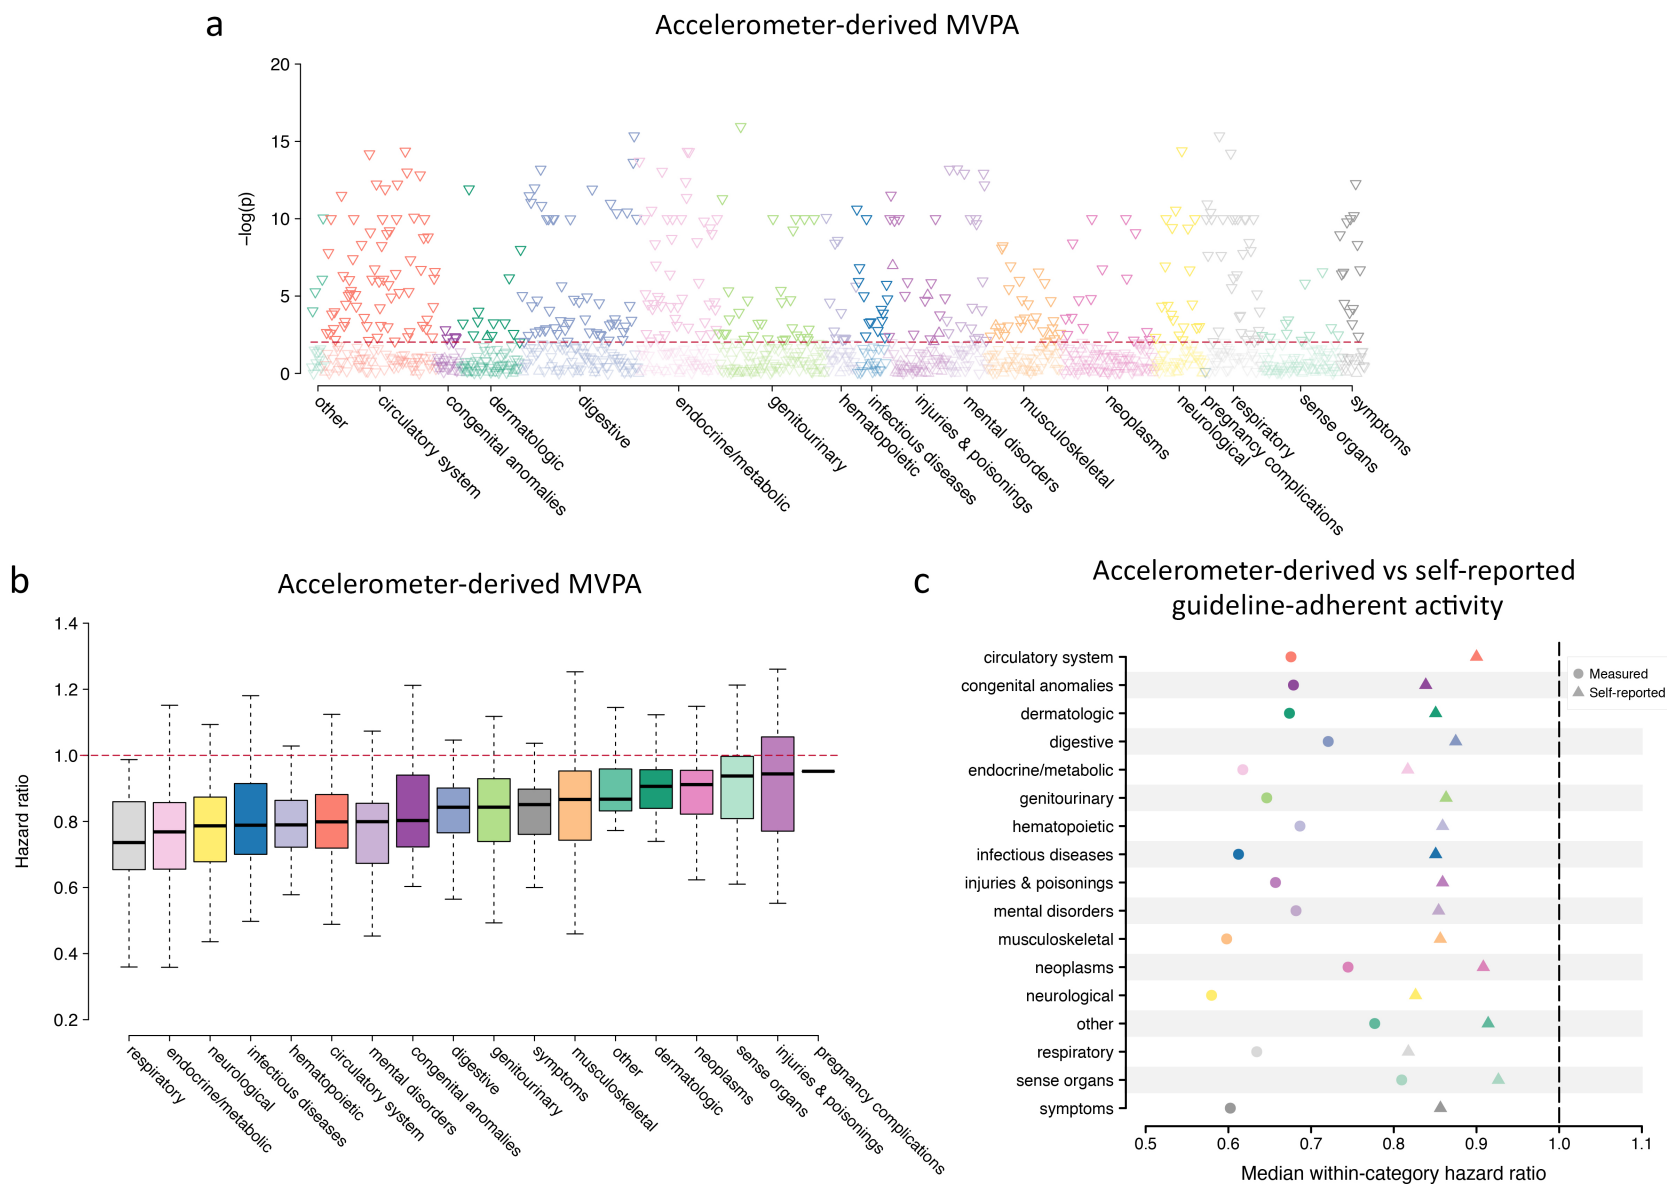

**Panel a** plots the negative log<sub>10</sub> p-value for the association between accelerometer-derived moderate-to-vigorous physical activity (MVPA) and incident disease (grouped by category on the x-axis) in Cox proportional hazards models adjusted for age, sex, and body mass index, with darker shaded points meeting significance at a false discovery rate (FDR) of 1% (horizontal red line). Upward facing triangles represent increased risk (hazard ratios >1), while downward facing triangles represent reduced risk (hazard ratio <1). **Panel b** shows the distribution of hazard ratios per 1 standard deviation increase in MVPA observed across each disease category (x-axis), with the thick horizontal line depicting the within-category median hazard ratio, the box representing quartile 1 to quartile 3, and the whiskers extending 1.5 interquartile ranges beyond. Categories are arranged by increasing median hazard ratio, from lowest (left) to highest (right). **Panel c** compares the median within-category hazard ratio observed with guideline-adherent activity (i.e., ≥150 minutes of MVPA per week<sup>4-6</sup>) defined using accelerometer-derived (circles) versus self-reported (triangles) MVPA. Included in the comparison are 324 diseases for which there was a nominally significant association (p<0.05) with both exposure definitions and an effect size suggesting a decreased risk of disease.

**Figure 3. Genetically inferred activity and incident disease**

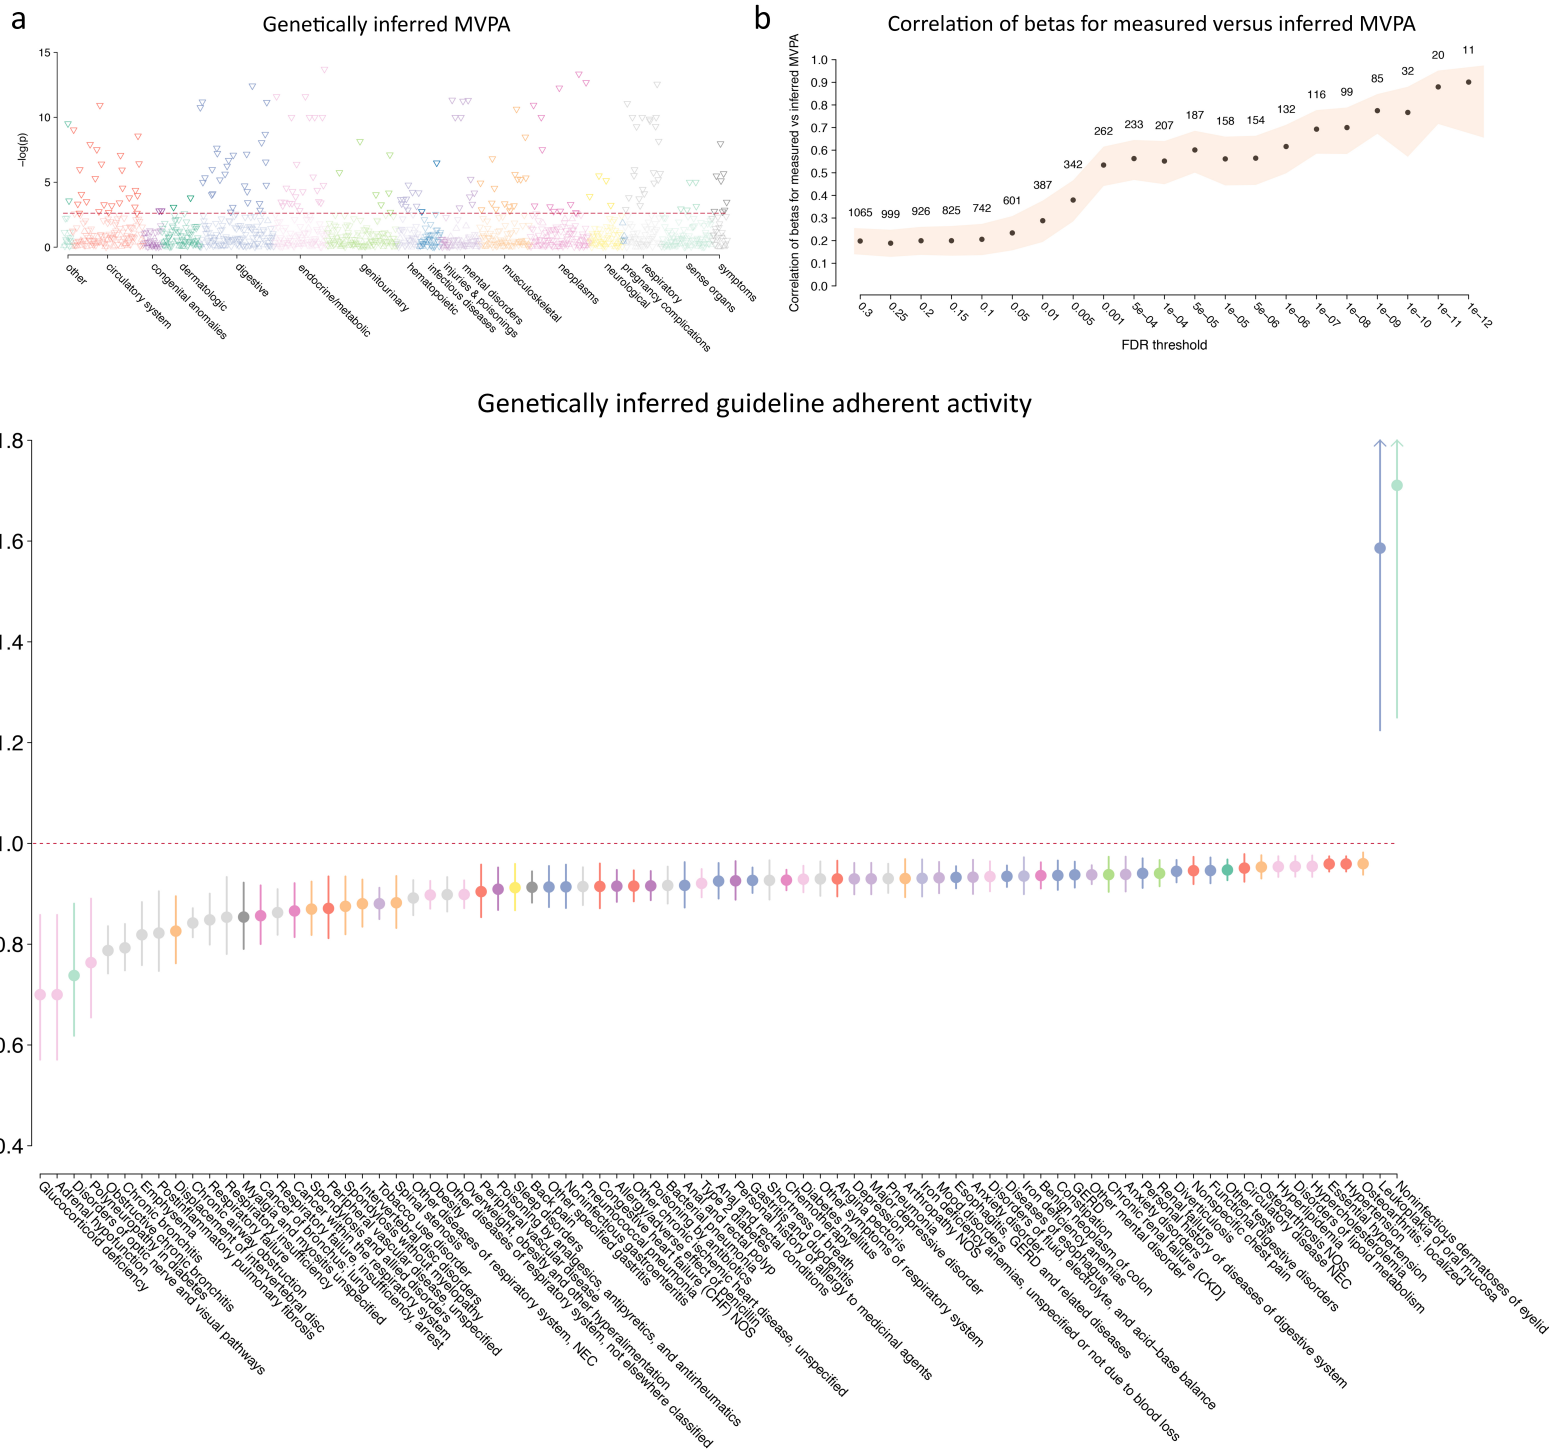

**Panel a** plots the negative log<sub>10</sub> p-value for the association between genetically inferred MVPA and individual diseases (grouped by category on the x-axis), in Cox proportional hazards models adjusted for age and sex, with darker shaded colors representing significant associations at a false discovery rate (FDR) of 1% (threshold



depicted by horizontal red line). **Panel b** shows the Pearson correlation between disease-specific beta coefficients for accelerometer-derived versus genetically inferred MVPA from their respective Cox models, as a function of increasing false discovery rate (FDR) threshold used to define a significant association with accelerometer-derived MVPA (x-axis). The number of diseases included in the correlation assessment is indicated above each point, and the 95% confidence interval is depicted by the shaded area. **Panel c** shows the hazard ratios associated with genetically inferred guideline-adherent activity (i.e.,  $\geq 150$  minutes of inferred MVPA per week<sup>4-6</sup>), with specific diseases listed on the x-axis. Points are colored to match the disease category groupings used in **Panel a**. Confidence intervals ending with arrows extend beyond the plotting area but have been truncated for graphical purposes.

**Figure 4.** Cumulative risk of disease stratified by guideline-adherent physical activity

**Accelerometer Measured Activity**

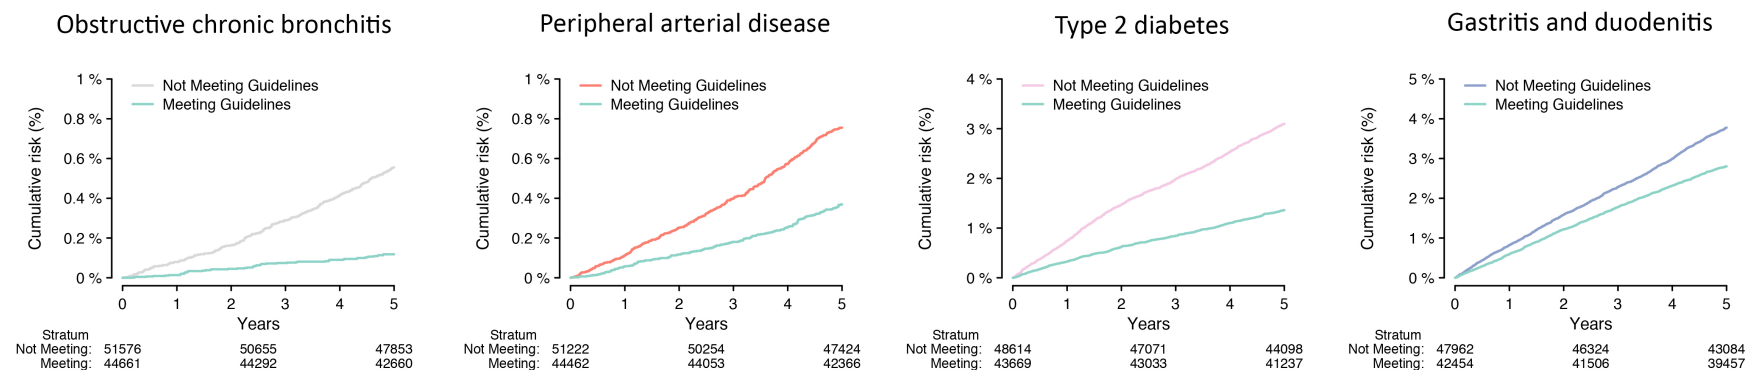

**Genetically Inferred Activity**

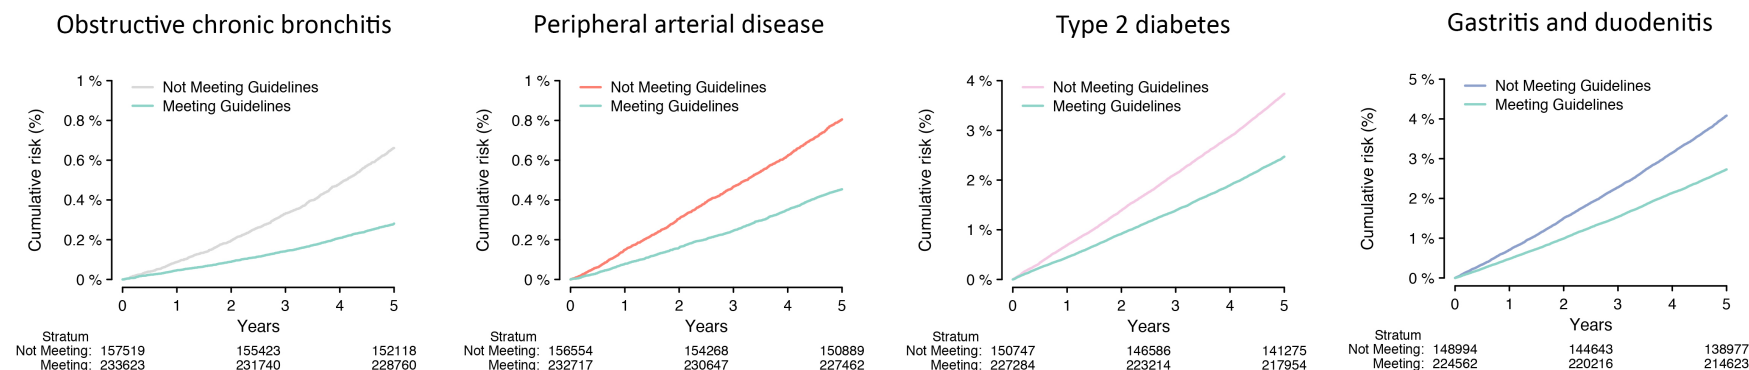

Depicted is the 5-year cumulative risk of obstructive chronic bronchitis, peripheral arterial disease, type 2 diabetes, and gastritis/duodenitis, stratified guideline-adherent activity according to accelerometer-derived MVPA (top panels) and according to genetically inferred MVPA (bottom). In each plot, individuals are grouped into binary categories according to the guideline-based threshold of  $\geq 150$  minutes of MVPA/week,<sup>4-6</sup> and the number remaining at risk over time is depicted below. Representative diseases were selected from the four categories having the greatest enrichment for associations with activity, where each disease was significantly associated with both accelerometer-derived and genetically inferred activity at a false discovery rate of 1%.
